# Supplementary material for: Osteocalcin serum concentrations and markers of energetic metabolism in pediatric patients. Systematic review and metanalysis
Source: Frontiers journal article supplement (doi:10.3389/fped.2022.1075738), 2023-01-12
Supplement: Image_1.PDF [file Image_1.PDF]

## SUPPLEMENT 1A. QUERY KEYWORDS

|                                                                                                                                                                                                                                                                                                                                                                                                                                                                         |
|-------------------------------------------------------------------------------------------------------------------------------------------------------------------------------------------------------------------------------------------------------------------------------------------------------------------------------------------------------------------------------------------------------------------------------------------------------------------------|
| <b>PubMed Query</b><br>(("osteocalcin"[MeSH Terms] OR "osteocalcin"[All Fields]) AND ("diabetes mellitus"[MeSH Terms] OR ("diabetes"[All Fields] AND "mellitus"[All Fields]) OR "diabetes mellitus"[All Fields] OR "diabetes"[All Fields] OR ("diabetes"[All Fields] AND "insipidus"[All Fields])) NOT ("review"[Publication Type] OR "review literature as topic"[MeSH Terms] OR "review"[All Fields]) AND ("humans"[MeSH Terms] AND (English[lang] OR Spanish[lang])) |
| <b>SCOPUS Query</b><br>TITLE-ABS-KEY(osteocalcin AND diabetes AND HUMAN) AND ( LIMIT-TO ( DOCTYPE,"ar " ) ) AND ( LIMIT-TO ( LANGUAGE,"English " ) OR LIMIT-TO ( LANGUAGE,"Spanish " ) )                                                                                                                                                                                                                                                                                |
| <b>WOS search</b><br>TS=osteocalcin OR, osteocalcin AND, diabetes mellitus OR, diabetes AND, mellitus OR, diabetes mellitus OR, diabetes OR, diabetes<br><b>Refined by: Document type:</b> ( ARTICLE ) AND [excluding] <b>Data base:</b> ( MEDLINE )<br><b>Period of search:</b> All years.<br>Language=Auto                                                                                                                                                            |

## SUPPLEMENT 1B. REASONS OF EXCLUSION

| Author          | Year | Reason of exclusion                                                |
|-----------------|------|--------------------------------------------------------------------|
| Boucher-Berry   | 2012 | No control group included                                          |
| Bouillon        | 1995 | Mix population (adults and children)                               |
| Brandao         | 2007 | No report of OC in control group                                   |
| De Schepper     | 1997 | No control group included                                          |
| Gogas Yavuz     | 2011 | Mix population (adults and children)                               |
| Gonzalez-Garcia | 2015 | No children                                                        |
| Ibañez          | 2010 | It is an experimental study                                        |
| Kemink          | 2000 | No children                                                        |
| Kocabas         | 2010 | Do not report OC levels                                            |
| Liu             | 2003 | Mix population (adults and children)                               |
| Mastrandrea     | 2008 | Mix population (adults and children)                               |
| Napoli          | 2013 | It is an experimental study                                        |
| Olmos           | 1994 | No children included                                               |
| Prats-Puig      | 2011 | No correlations; no comparisons of OC levels among diabetes and HS |

|              |      |                                                                                                                         |
|--------------|------|-------------------------------------------------------------------------------------------------------------------------|
| Simm         | 2011 | It is an experimental study                                                                                             |
| Thrailkill   | 2011 | Mix population (adults and children)                                                                                    |
| Tsentidis    | 2016 | No serum levels of OC reported; nor correlations                                                                        |
| Verroti      | 1999 | Mix population (adults and children)                                                                                    |
| Gajewska     | 2017 | No diabetics; no correlations of OC with metabolic parameters; no OC serum levels                                       |
| Poomthavorn  | 2013 | No diabetics; no correlations of OC with metabolic parameters; no OC serum levels                                       |
| Saggese      | 1991 | It is an experimental study                                                                                             |
| Topaglu      | 2005 | It was made in diabetic ketoacidosis patients (acute illness)                                                           |
| Diniz-Santos | 2007 | It reports only cases of patients with T1D with and without celiac disease                                              |
| Flemming     | 2012 | Because the study was performed only in healthy children and adolescents. It does not include diabetic patients         |
| Tsentidis    | 2015 | Because the correlation reported was between logOC and glycemia but not between absolute OC concentrations and glycemia |
