# Supplementary material for: Osteocalcin serum concentrations and markers of energetic metabolism in pediatric patients. Systematic review and metanalysis
Source: Frontiers journal article supplement (doi:10.3389/fped.2022.1075738), 2023-01-12

A

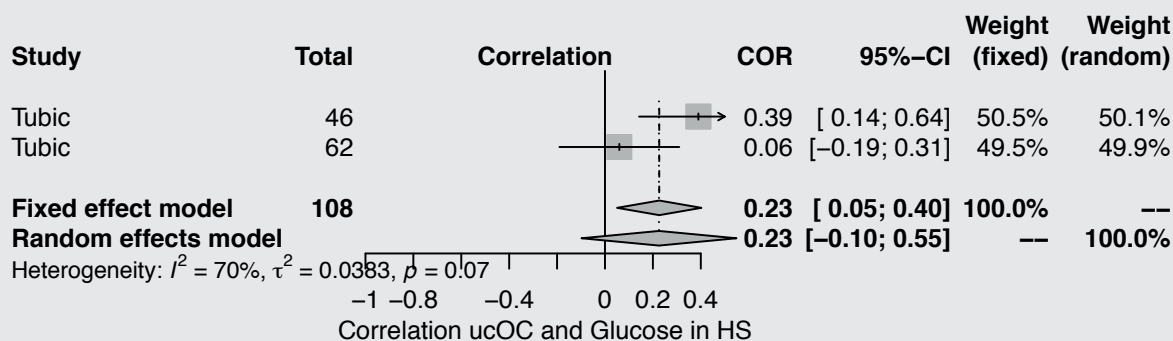

B

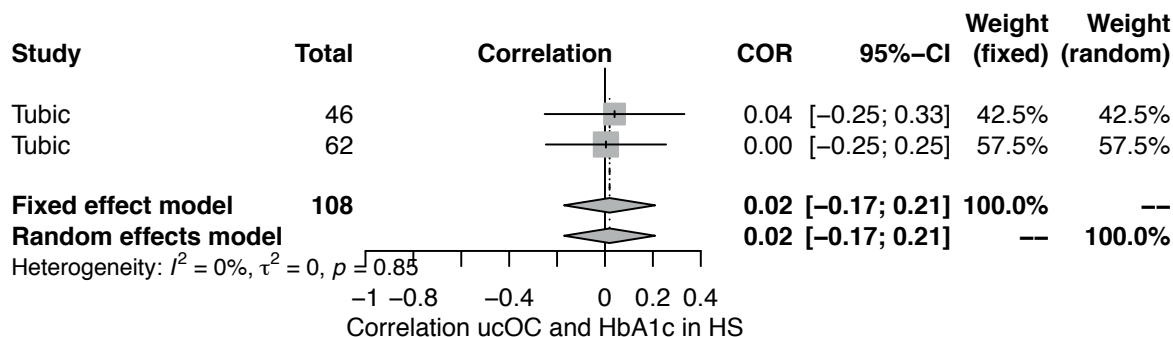

C

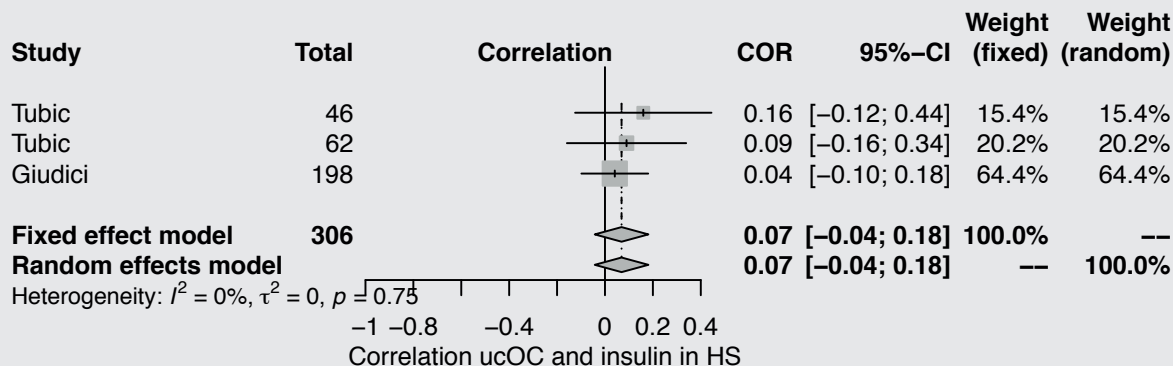

D

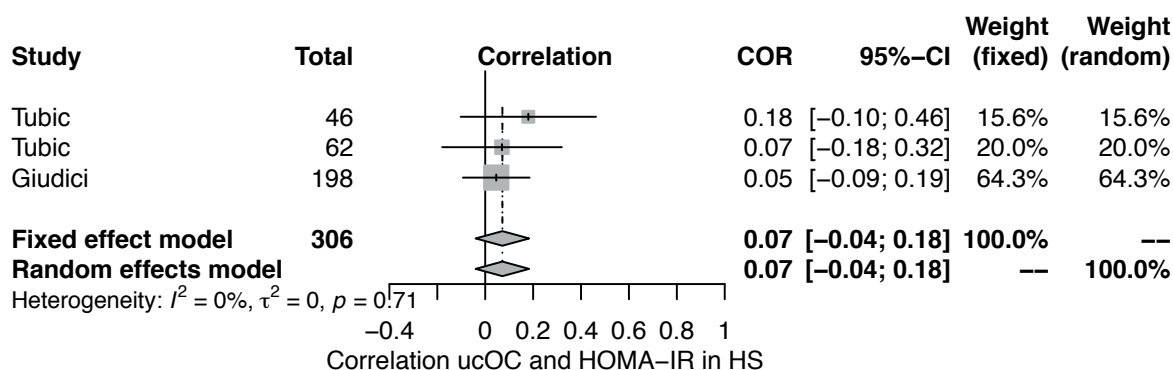

E

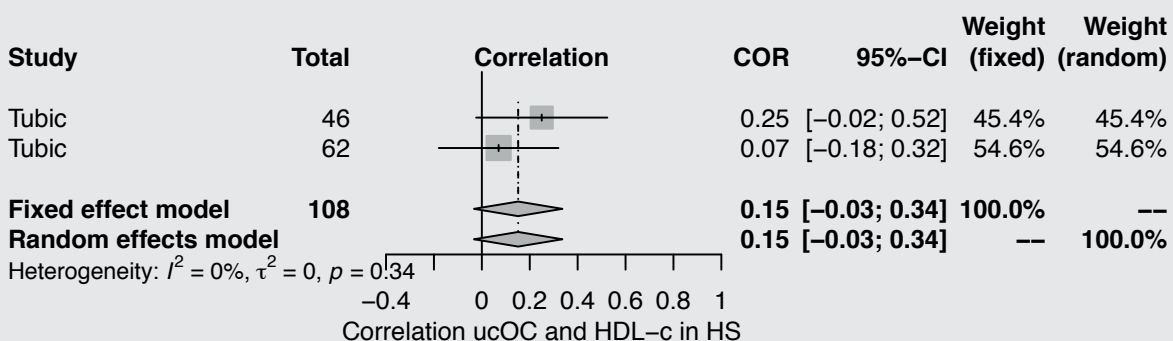

F

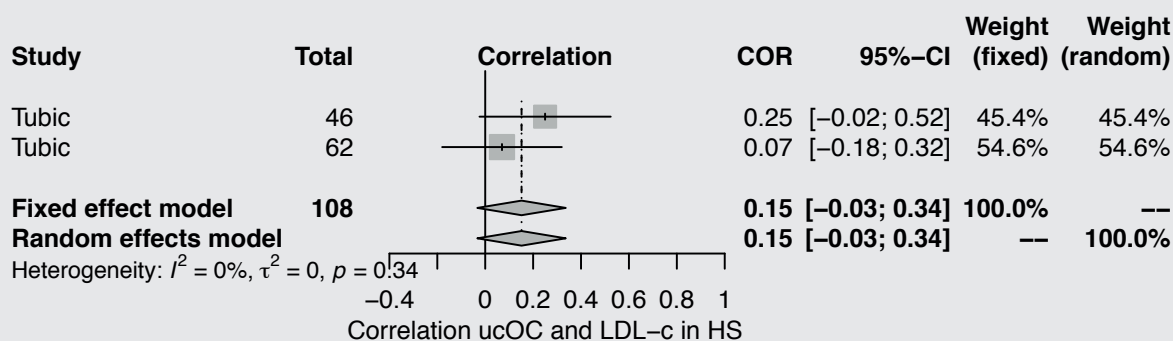

G

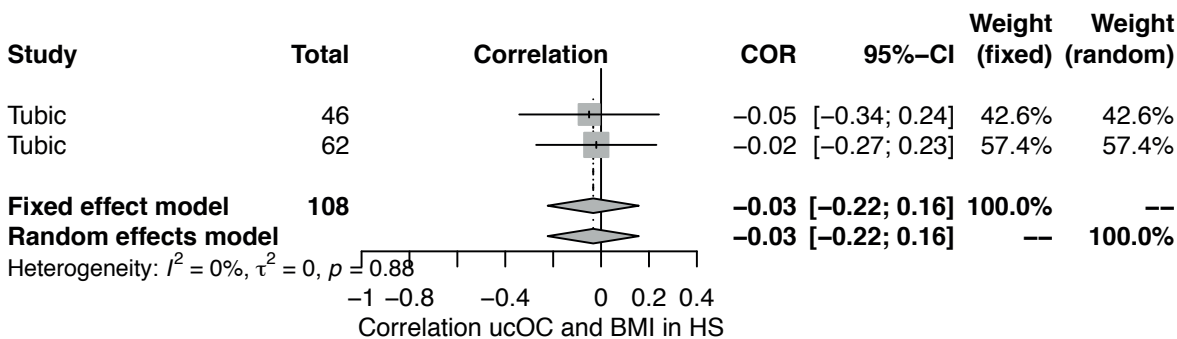

H

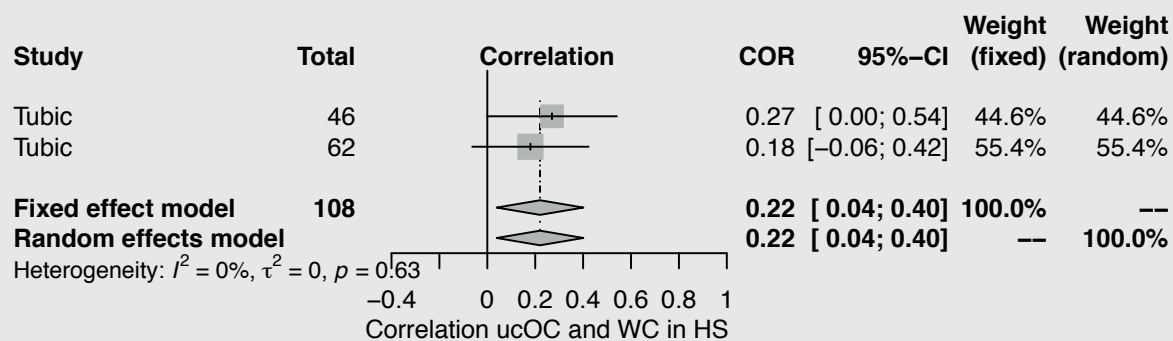

I

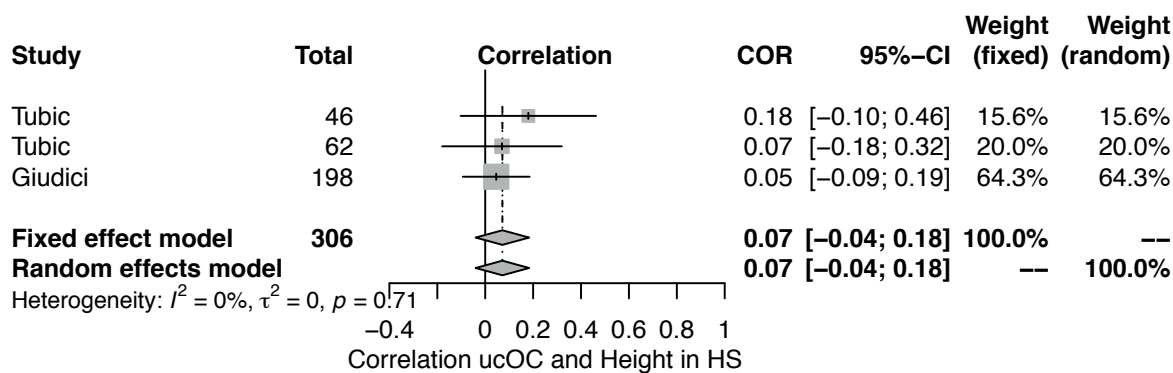

J

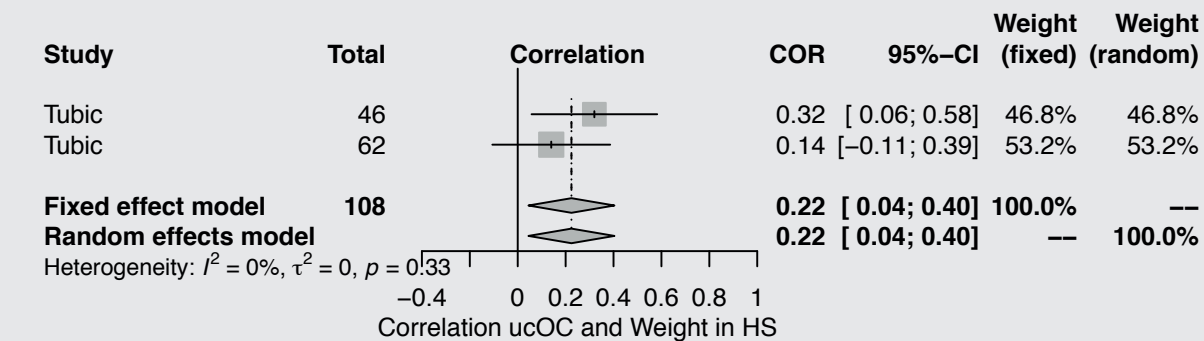

K

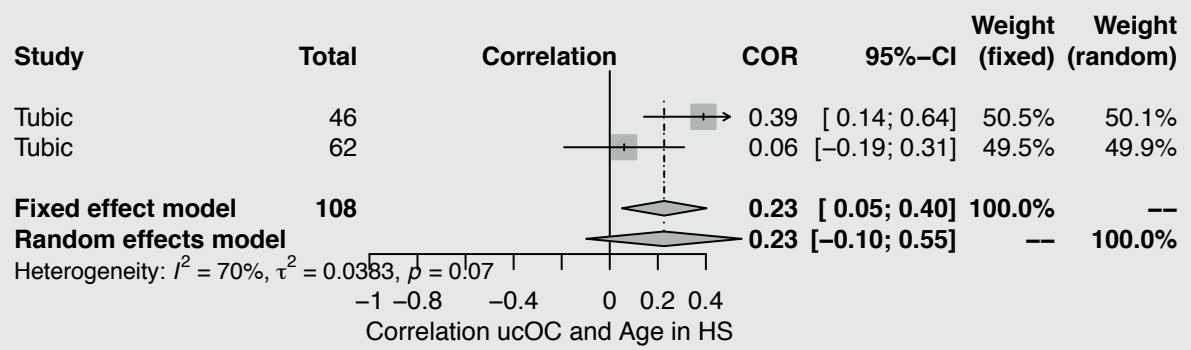

Supplement: Image_4.PDF [file Image_4.PDF]
