# Supplementary material for: Osteocalcin serum concentrations and markers of energetic metabolism in pediatric patients. Systematic review and metanalysis
Source: Frontiers journal article supplement (doi:10.3389/fped.2022.1075738), 2023-01-12

Forest Plot

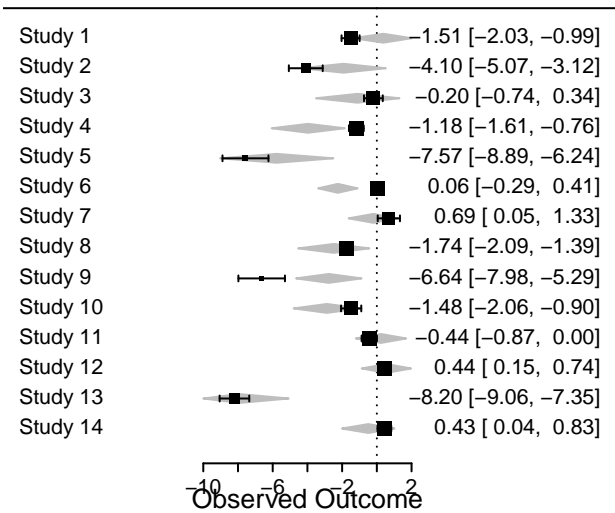

Residual Funnel Plot

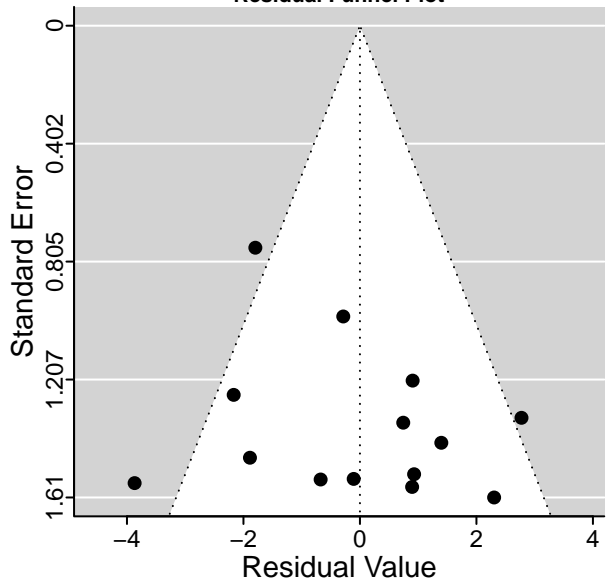

Fitted vs. Standardized Residuals

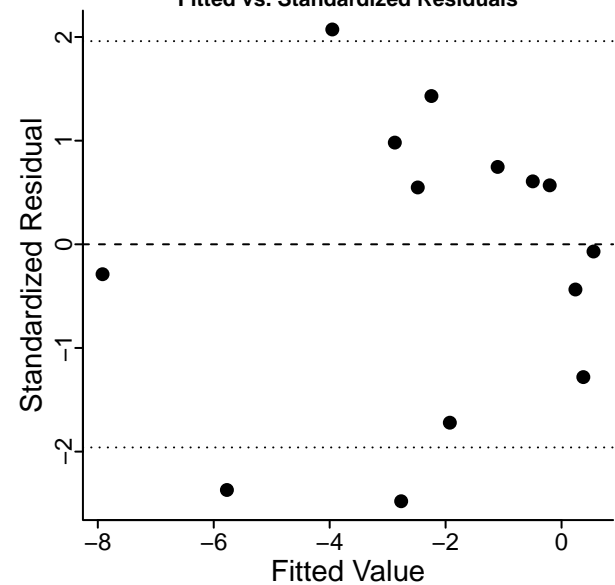

Standardized Residuals

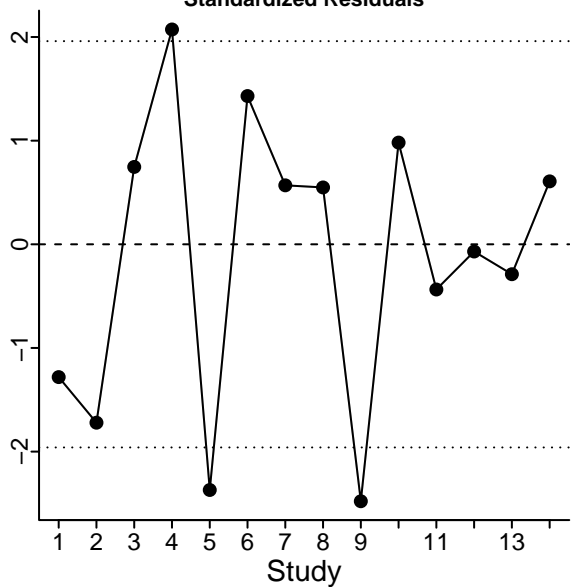

Supplement: Image_6.PDF [file Image_6.PDF]
